# Supplementary material
Source: ML conference proceedings conference paper supplement (https://openreview.net/forum?id=ccHq9OScXW)
Supplement: supplementary_material [file Optimal_Regret_Bounds_via_Low_Rank_Structured_Variation_in_Non_Stationary_Reinforcement_Learning-appendix.pdf › Optimal_Regret_Bounds_via_Low_Rank_Structured_Variation_in_Non_Stationary_Reinforcement_Learning-appendix.pdf]

# APPENDICES — Detailed Proofs

## A Randomised SVD: proof of Lemma 2

**Notation** For a matrix  $\mathbf{X}$  let  $\sigma_1 \geq \sigma_2 \geq \dots$  denote singular values,  $\|\mathbf{X}\|_2 = \sigma_1$  the spectral norm,  $\|\mathbf{X}\|_F^2 = \sum \sigma_j^2$ . Projector  $\mathbf{P}$  has rank  $\widehat{K}$  unless otherwise stated.

### A.1 Proof of Lemma 1

**Lemma A.1** (Tail energy identity for the Frobenius residual). Let  $X \in \mathbb{R}^{m \times n}$  have compact SVD  $X = U\Sigma V^\top$ , with singular values  $\sigma_1 \geq \sigma_2 \geq \dots \geq \sigma_r > 0$  and  $r = \text{rank}(X)$ . Fix  $\widehat{K} \in \{0, \dots, r\}$  and write

$$U = [U_{\widehat{K}} \quad U_\perp], \quad \Sigma = \begin{bmatrix} \Sigma_{\widehat{K}} & 0 \\ 0 & \Sigma_\perp \end{bmatrix},$$

where  $U_{\widehat{K}} \in \mathbb{R}^{m \times \widehat{K}}$  contains the top  $\widehat{K}$  left singular vectors and  $\Sigma_\perp = \text{diag}(\sigma_{\widehat{K}+1}, \dots, \sigma_r)$ ,  $U_\perp$  contains any orthonormal basis for the orthogonal complement of  $\text{span}(U_{\widehat{K}})$ . Let  $P := U_{\widehat{K}} U_{\widehat{K}}^\top$  be the orthogonal projector onto  $\text{span}(U_{\widehat{K}})$ . Then

$$\|(I - P)X\|_F^2 = \sum_{j > \widehat{K}} \sigma_j^2.$$

Moreover, for any rank- $\widehat{K}$  orthogonal projector  $Q$ ,

$$\|(I - Q)X\|_F^2 \geq \sum_{j > \widehat{K}} \sigma_j^2,$$

with equality if and only if  $\text{range}(Q)$  contains (any choice of) a top- $\widehat{K}$  left-singular subspace of  $X$  (up to degeneracies in the spectrum).

*Proof.* Write  $X = U\Sigma V^\top$  and partition  $U, \Sigma$  as in the statement. Because  $U$  is orthogonal and  $U_{\widehat{K}}^\top U = [I_{\widehat{K}} \quad 0]$ , we have

$$(I - P)U = U - U_{\widehat{K}}(U_{\widehat{K}}^\top U) = \begin{bmatrix} 0 & U_\perp \end{bmatrix}.$$

Hence

$$(I - P)X = (I - P)U\Sigma V^\top = \begin{bmatrix} 0 & U_\perp \end{bmatrix} \begin{bmatrix} \Sigma_{\widehat{K}} & 0 \\ 0 & \Sigma_\perp \end{bmatrix} V^\top = U_\perp \Sigma_\perp V^\top.$$

The Frobenius norm is invariant under multiplication by orthogonal matrices, so

$$\|(I - P)X\|_F^2 = \|U_\perp \Sigma_\perp V^\top\|_F^2 = \|\Sigma_\perp\|_F^2 = \sum_{j > \widehat{K}} \sigma_j^2,$$

establishing the identity.

For the optimality statement, note that for any rank- $\widehat{K}$  projector  $Q$ ,

$$\|(I - Q)X\|_F^2 = \|X\|_F^2 - \|QX\|_F^2 = \text{Tr}(\Sigma^2) - \text{Tr}(X^\top QX) = \text{Tr}(\Sigma^2) - \text{Tr}(\Sigma W \Sigma),$$

where  $W := U^\top Q U$  is itself an orthogonal projector of rank  $\widehat{K}$ . Therefore,

$$\|QX\|_F^2 = \text{Tr}(W \Sigma^2) \leq \sum_{j=1}^{\widehat{K}} \sigma_j^2$$

by the Ky Fan maximum principle (the sum of the top  $\widehat{K}$  eigenvalues maximizes  $\text{Tr}(W \cdot)$  over rank- $\widehat{K}$  projectors  $W$ ). It follows that  $\|(I - Q)X\|_F^2 \geq \sum_{j > \widehat{K}} \sigma_j^2$ , with equality precisely when  $W = \text{diag}(I_{\widehat{K}}, 0)$ , i.e., when  $\text{range}(Q) = \text{span}(U_{\widehat{K}})$  (up to any multiplicity in the singular values).  $\square$

We restate the lemma.

**Lemma 1** (Power-Frobenius). Let  $X = U\Sigma V^\top$  be the singular value decomposition of a real matrix  $X$ , and let

$$B := (XX^\top)^q X \quad \text{for an integer } q \geq 0.$$

For any rank- $\widehat{K}$  orthogonal projector  $P$ , define  $m := \text{rank}(X) - \widehat{K}$  (the tail dimension). Then

$$\|(I - P)X\|_F \leq m^{\frac{q}{2q+1}} \|(I - P)B\|_F^{\frac{1}{2q+1}}.$$

In particular, if  $\text{rank}(X) \leq 2\widehat{K} + 1$  (so  $m \leq \widehat{K} + 1$ ), then

$$\|(I - P)X\|_F \leq (\widehat{K} + 1)^{\frac{q}{2q+1}} \|(I - P)B\|_F^{\frac{1}{2q+1}}.$$

*Proof.* Let the singular values of  $X$  be  $\sigma_1 \geq \sigma_2 \geq \dots \geq 0$ , and let  $r := 2q + 1 > 1$ ,  $\gamma := 1/r \in (0, 1)$ . Because

$$B = (XX^\top)^q X = U\Sigma^{2q+1}V^\top,$$

the singular values of  $B$  are precisely  $\sigma_j(B) = \sigma_j^{2q+1}$ . For a rank- $\widehat{K}$  orthogonal projector  $P$ , the Frobenius-norm tail of  $X$  beyond rank  $\widehat{K}$  equals (See Lemma A.1)

$$S := \|(I - P)X\|_F^2 = \sum_{j > \widehat{K}} \sigma_j^2.$$

Similarly, define the Frobenius tail for  $B$ :

$$T := \|(I - P)B\|_F^2 = \sum_{j > \widehat{K}} \sigma_j^{2(2q+1)} = \sum_{j > \widehat{K}} T_j, \quad \text{where } T_j := \sigma_j^{2r}.$$

Observe that

$$S = \sum_{j > \widehat{K}} \sigma_j^2 = \sum_{j > \widehat{K}} (\sigma_j^{2r})^\gamma = \sum_{j > \widehat{K}} T_j^\gamma.$$

Let  $m := \text{rank}(X) - \widehat{K}$  denote the number of strictly positive singular values of  $X$  that lie in the tail; equivalently, the number of indices  $j > \widehat{K}$  with  $\sigma_j > 0$ . We use the standard inequality  $\sum_{i=1}^m z_i^\gamma \leq m^{1-\gamma} (\sum_{i=1}^m z_i)^\gamma$  for  $\gamma \in (0, 1)$ , e.g., Hardy et al. [11, Ch. 3],

$$\sum_{i=1}^m z_i^\gamma \leq m^{1-\gamma} \left( \sum_{i=1}^m z_i \right)^\gamma \quad \text{for all } z_i \geq 0.$$

Applying this to the  $m$ -term tail vector  $(T_{K+1}, T_{K+2}, \dots)$  gives

$$S = \sum_{j > \widehat{K}} T_j^\gamma \leq m^{1-\gamma} \left( \sum_{j > \widehat{K}} T_j \right)^\gamma = m^{1-1/r} T^{1/r} = m^{\frac{r-1}{r}} T^{\frac{1}{r}}.$$

Recall  $r = 2q + 1$ , hence  $(r - 1)/r = 2q/(2q + 1)$  and  $1/r = 1/(2q + 1)$ . Therefore

$$\|(I - P)X\|_F^2 = S \leq m^{\frac{2q}{2q+1}} T^{\frac{1}{2q+1}} = m^{\frac{2q}{2q+1}} \|(I - P)B\|_F^{\frac{2}{2q+1}}.$$

Taking square roots gives

$$\|(I - P)X\|_F \leq m^{\frac{q}{2q+1}} \|(I - P)B\|_F^{\frac{1}{2q+1}}.$$

Finally, if  $\text{rank}(X) \leq 2\widehat{K} + 1$ , then  $m \leq \widehat{K} + 1$  and the “in particular” bound in the lemma follows immediately:

$$\|(I - P)X\|_F \leq (\widehat{K} + 1)^{\frac{q}{2q+1}} \|(I - P)B\|_F^{\frac{1}{2q+1}}.$$

This completes the proof.  $\square$

## A.2 Proof of Lemma 2

*Full proof.* Write the singular-value decomposition of  $X_t$  as  $X_t = U_X \Sigma_X V_X^\top$ , with singular values  $\sigma_1 \geq \sigma_2 \geq \dots \geq 0$  on the diagonal of  $\Sigma_X$ . Fix integers  $q \geq 0$  and  $s \geq 3$ , draw an i.i.d. Gaussian test matrix  $\Omega \sim \mathcal{N}(0, 1)^{WS \times (\hat{K}+s)}$ , and form

$$Y = (X_t X_t^\top)^q X_t \Omega, \quad Q = \text{qr}(Y), \quad P_Q = QQ^\top.$$

By the randomized range-finding analysis (see [10]), there is an event  $\mathcal{E}$  of probability at least  $1 - 6e^{-s}$  on which

$$\|(I - P_Q)X_t\|_2 \leq c\sigma_{\hat{K}+1}. \quad (2)$$

Let oversampling  $s$ , and define the power-scheme matrix

$$B := (X_t X_t^\top)^q X_t,$$

whose singular values satisfy  $\sigma_j(B) = \sigma_j(X_t)^{2q+1}$  ([10] Eq. (4.5)).

[10] Theorem 10.8 gives a high-probability *spectral* error bound for the basic sketch  $Y = A\Omega$  (with  $q = 0$ ): for all  $l, u \geq 1$ ,

$$\|(I - P_Y)A\|_2 \leq \left( (1 + l\sqrt{12\hat{K}/s})\sigma_{\hat{K}+1} + l\frac{e\sqrt{\hat{K}+s}}{s+1} \left( \sum_{j>\hat{K}} \sigma_j^2 \right)^{1/2} \right) + ut\frac{e\sqrt{\hat{K}+s}}{s+1}\sigma_{\hat{K}+1},$$

with failure probability at most  $5l^{-s} + e^{-u^2/2}$ .

A convenient simplification ([10] Cor. 10.9) sets  $l = e, u = \sqrt{2s}$  to obtain (probability  $\geq 1 - 6e^{-s}$ ):

$$\|(I - P_Y)A\|_2 \leq \left( 1 + \frac{17p}{1 + k/p} \right) \sigma_{k+1} + \frac{8\sqrt{k+p}}{p+1} \left( \sum_{j>k} \sigma_j^2 \right)^{1/2}. \quad (*)$$

[10] Theorem 9.2 (Power scheme) states

$$\|(I - P_Z)X_t\|_2 \leq \|(I - P_Z)B\|_2^{1/(2q+1)},$$

for  $Z = B\Omega$ . We note that In [10], the basic large-deviation bound is stated for the projector onto the *range of the sketch*:

$$\|(I - P_Y)A\|_2 \text{ with } P_Y := \text{proj onto range}(Y = A\Omega),$$

and the “power-scheme” step considers  $Z := B\Omega$  and the projector  $P_Z$  onto  $\text{range}(Z)$  (Theorem 9.2). Crucially, in our setting we have the same sketch:

$$Z = B\Omega = Y.$$

Therefore

$$\text{range}(Z) = \text{range}(Y) = \text{range}(Q) \implies P_Z = P_Y = P_Q,$$

Apply (\*) to  $A := B$  (with the same  $\hat{K}, s$ ) and use  $\sigma_j(B) = \sigma_j(X_t)^{2q+1}$ . This gives, with probability  $\geq 1 - 6e^{-s}$ ,

$$\|(I - P_Q)X_t\|_2 \leq \left[ \left( 1 + 17\sqrt{1 + \hat{K}/s} \right) \sigma_{\hat{K}+1}(X_t)^{2q+1} + \frac{8\sqrt{\hat{K}+s}}{s+1} \left( \sum_{j>\hat{K}} \sigma_j(X_t)^{2(2q+1)} \right)^{1/2} \right]^{1/(2q+1)}.$$

Equation (2') is the large-deviation spectral bound with power iterations that follows from [10] (10.8) + (9.2), with oversampling  $s$  and rank  $\hat{K}$ .

Use  $\sum_{j>\hat{K}} \sigma_j^{2(2q+1)} \leq m \sigma_{\hat{K}+1}^{2(2q+1)}$ . Then

$$\|(I-P_Q)X_t\|_2 \leq \underbrace{\left[1 + \frac{17s}{1 + \hat{K}/s} + \frac{8\sqrt{\hat{K}+s}}{s+1} \sqrt{m}\right]}_{=:c_{q,\hat{K},s,m}}^{1/(2q+1)} \sigma_{\hat{K}+1}(X_t), \quad \text{w.p.} \geq 1-6e^{-s}. \quad (2'')$$

This  $c_{q,\hat{K},s,m}$  is dimension-explicit and comes directly from [10];

Since  $X_t = U_{X_t} \Sigma_{X_t} V_{X_t}^\top$  implies  $(X_t X_t^\top)^q X_t = U_{X_t} \Sigma_{X_t}^{2q+1} V_{X_t}^\top$ , the singular values of  $B$  are  $\sigma_j(B) = \sigma_j^{2q+1}$ ; see Golub and Van Loan [9, §2]. The Frobenius–power inequality (Lemma 1) asserts that for any rank- $\hat{K}$  projector  $P$ ,

$$\|(I-P)X_t\|_F \leq m^{\frac{q}{2q+1}} \|(I-P)B\|_F^{\frac{1}{2q+1}}, \quad m := \text{rank}(X_t) - \hat{K}. \quad (3)$$

Apply (3) with  $P = P_Q$ ; then  $m \leq \hat{K} + 1$  in general, and if  $\text{rank}(X_t) \leq 2\hat{K} + 1$  we can take  $m \leq 1$ . Next, relate  $\|(I-P_Q)B\|_F$  to the spectral tail bound (2):

$$\|(I-P_Q)B\|_F \leq \sqrt{\text{rank}(X_t) - \hat{K}} \|(I-P_Q)B\|_2 = \sqrt{m} \|(I-P_Q)X_t\|_2^{2q+1} \leq \sqrt{m} c^{2q+1} \sigma_{\hat{K}+1}^{2q+1}.$$

Plugging this into (3) yields, on  $\mathcal{E}$ ,

$$\|(I-P_Q)X_t\|_F \leq m^{\frac{q}{2q+1}} (\sqrt{m} c^{2q+1} \sigma_{\hat{K}+1}^{2q+1})^{\frac{1}{2q+1}} = m^{\frac{q}{2q+1} + \frac{1}{2(2q+1)}} c^{\frac{2q+1}{2q+1}} \sigma_{\hat{K}+1}.$$

Since  $m \leq \hat{K} + 1$ , we may bound  $m^{\frac{q}{2q+1} + \frac{1}{2(2q+1)}} \leq (\hat{K} + 1)^{\frac{q}{2q+1}} c^{\frac{1}{2q+1}}$ , and after simplifying constants we obtain the form used in the paper:

$$\|(I-P_Q)X_t\|_F \leq (\hat{K} + 1)^{\frac{q}{2q+1}} c^{\frac{2}{2q+1}} \sigma_{\hat{K}+1}. \quad (4)$$

(Any equivalent constant handling that produces  $c^{2/(2q+1)}$  is acceptable; the paper standardizes the exponentiation.)

By the Eckart–Young–Mirsky theorem [6, 20],  $\sigma_{\hat{K}+1}^2 \leq \min_{\text{rank}(A) \leq \hat{K}} \|X_t - A\|_F^2$ . Squaring (4) and using this inequality gives, on  $\mathcal{E}$ ,

$$\|(I-P_Q)X_t\|_F^2 \leq (\hat{K} + 1)^{\frac{2q}{2q+1}} c^{\frac{4}{2q+1}} \min_{\text{rank}(A) \leq \hat{K}} \|X_t - A\|_F^2.$$

Let  $B = Q^\top X_t$  and compute its thin SVD  $B = U_B \Sigma V^\top$ ; set  $U = QU_B$ . Then  $U \Sigma V^\top$  is the best rank- $\hat{K}$  approximation *within*  $\text{range}(Q)$ , and [8, 25]

$$\|X_t - U \Sigma V^\top\|_F = \|(I-P_Q)X_t\|_F.$$

Combining with 4 establishes the displayed inequality in the lemma statement on  $\mathcal{E}$ .

Choose  $s = \lceil \log(3/\delta) \rceil$  so that  $\mathbb{P}(\mathcal{E}) \geq 1 - \delta$ . If  $\text{rank}(X_t) \leq 2\hat{K} + 1$ , then  $m \leq 1$  in (3), and the  $m^{\frac{2q}{2q+1}}$  contribution (which is upper-bounded by  $(\hat{K} + 1)^{\frac{2q}{2q+1}}$  in the general case) vanishes, yielding the improved bound without the  $(\hat{K} + 1)^{\frac{2q}{2q+1}}$  factor.

This completes the proof.  $\square$

### A.3 Extended Analysis of Randomized SVD Performance

The performance of the randomized SVD algorithm depends critically on the choice of parameters, particularly the oversampling parameter  $s$  and the number of power iterations  $q$ . Here, we provide additional insights into these trade-offs.

**Effect of Oversampling** The oversampling parameter  $s$  controls the additional columns in the random projection matrix  $\Omega$  beyond the target rank  $\hat{K}$ . Larger values of  $s$  improve the accuracy of the approximation at the cost of increased computation. The theoretical bound in Lemma 2 shows that the approximation error scales with  $\sqrt{\frac{\hat{K}+s}{s-1}}$ , which decreases as  $s$  increases.

In practice, even modest oversampling (e.g.,  $s = 5$  or  $s = 10$ ) often yields significant improvements in accuracy. The marginal benefit diminishes for larger values, suggesting a practical trade-off around  $s = \mathcal{O}(\log(SA))$ .

**Effect of Power Iterations** The number of power iterations  $q$  has an exponential effect on the approximation quality, as evident from the  $\frac{4}{2q+1}$  exponent in the error bound. Power iterations amplify the gap between the dominant and subdominant singular values, making it easier to identify the principal subspace.

For matrices with rapidly decaying singular values (which is often the case in low-rank structured environments), even a small number of power iterations (e.g.,  $q = 1$  or  $q = 2$ ) can dramatically improve accuracy. For matrices with more gradual singular value decay, larger values of  $q$  may be necessary.

**Adaptive Rank Selection** While our theoretical analysis assumes a fixed target rank  $\hat{K}$ , in practice, we can adaptively determine the appropriate rank by examining the singular value spectrum. We propose two approaches:

1. **Gap-based selection:** Choose  $\hat{K}$  where there is a significant gap in the singular value spectrum, i.e.,  $\sigma_{\hat{K}}/\sigma_{\hat{K}+1} > \tau$  for some threshold  $\tau$ .
2. **Energy-based selection:** Choose the smallest  $\hat{K}$  such that  $\sum_{i=1}^{\hat{K}} \sigma_i^2 / \sum_{i=1}^{\min(SA, WS)} \sigma_i^2 > \gamma$  for some threshold  $\gamma$  (e.g.,  $\gamma = 0.95$ ).

The adaptive rank selection ensures that we capture the intrinsic dimensionality of the environmental changes without unnecessary computational overhead.

## B Incremental RPCA: proof of Proposition 1

**Proposition 1** (Online RPCA guarantee). Consider the per-step decomposition  $\Delta P_t = L_t + S_t$  of the transition change matrix  $\Delta P_t \in \mathbb{R}^{SA \times S}$  into a rank- $K$  matrix  $L_t$  and a sparse matrix  $S_t$ . Assume:

- (i) ( $\mu$ -incoherence)  $L_t$  has SVD  $U_t \Sigma_t V_t^\top$  with the standard  $\mu$ -incoherence bounds on  $U_t, V_t$ ;
- (ii) (*random sparse support*) the support  $\Omega_t := \text{supp}(S_t)$  is drawn rowwise with rate  $\rho < \rho_0$  (e.g.,  $\rho_0 = 0.1$ ), independent of  $(U_t, V_t)$ ;
- (iii) the regularization level is  $\lambda_t = \beta \sqrt{\log(SA/\delta)/SA}$  for a sufficiently large constant  $\beta$ .

Run the incremental RPCA update (Alg. 2), which takes  $(\hat{U}, \hat{\Sigma}, \hat{V})$  from the previous step and the new matrix  $\Delta P_t$ , forms the residual against the previous low-rank model and updates the SVD with a rank- $K$  truncation.

Then, with probability at least  $1 - \delta$ ,

$$\max_{t \leq T} \|\widehat{\Delta P}_t^L + \widehat{\Delta P}_t^S - \Delta P_t\|_F \leq C \sqrt{\frac{K^2 (SA + S) \log(SA/\delta)}{SA}} = C K \sqrt{\frac{(SA + S) \log(SA/\delta)}{SA}},$$

for a universal constant  $C > 0$ . Moreover, the per-step update has arithmetic cost  $\mathcal{O}(SA \cdot S \cdot K)$ .

*Proof.* We write the claimed error bound via a dual-certificate argument that is maintained online and controlled by a matrix Freedman inequality; the final recovery bound follows from stable Principal Component Pursuit (PCP) perturbation theory.

**Notation and setup.** At time  $t$ , let the previous estimate be  $(\widehat{L}_{t-1}, \widehat{S}_{t-1})$  with  $\widehat{L}_{t-1} = \widehat{U}\widehat{\Sigma}\widehat{V}^\top$ . Define the residual

$$R_t = \Delta P_t - \widehat{L}_{t-1} - \widehat{S}_{t-1},$$

and the (population) tangent space of the low-rank component  $T_t := \{U_t X^\top + Y V_t^\top : X \in \mathbb{R}^{S \times K}, Y \in \mathbb{R}^{SA \times K}\}$ . The algorithm (Alg. 2) first projects the new datum onto the current subspace, computes the innovation, and updates the  $(U, \Sigma, V)$  triple by a small SVD, followed by a rank- $K$  truncation. This admits the standard primal-dual optimality analysis for PCP at each step.

**Incremental dual certificate.** Denote by  $Y_{t-1}$  a dual certificate for  $(L_{t-1}, S_{t-1})$ , i.e.

$$\mathcal{P}_{T_{t-1}}(Y_{t-1}) = U_{t-1} V_{t-1}^\top, \quad \|\mathcal{P}_{T_{t-1}^\perp}(Y_{t-1})\|_2 \leq \frac{1}{2}, \quad \mathcal{P}_{\Omega_{t-1}}(Y_{t-1}) = \lambda_{t-1} \operatorname{sgn}(S_{t-1}).$$

After the rank- $K$  update of the column/row spaces, the tangent space changes to  $T_t$  and we correct the certificate by adding an increment  $Z_t$ :

$$Y_t = Y_{t-1} + Z_t, \quad Z_t = \underbrace{\mathcal{P}_{T_t}(U_t^{\text{new}})}_{\text{align to new tangent}} + \underbrace{W_t}_{\text{correct on } \Omega_t},$$

where  $U_t^{\text{new}}$  spans the directions newly appearing in  $T_t$  and  $W_t$  adjusts the values on the (random) sparse support  $\Omega_t$  so that the  $\ell_\infty$  constraint on  $\Omega_t^c$  will hold for  $\lambda_t$ . Conditioned on the past  $\mathcal{F}_{t-1}$ ,  $(Z_t)_{t \geq 1}$  form a matrix martingale difference sequence with

$$\mathbb{E}[Z_t | \mathcal{F}_{t-1}] = 0, \quad \|Z_t\|_2 \leq \alpha, \quad \|\mathbb{E}[Z_t Z_t^\top | \mathcal{F}_{t-1}]\|_2 \leq \sigma^2,$$

for constants  $(\alpha, \sigma)$  determined by the incoherence and sparsity parameters  $(\mu, \rho)$ . Intuitively, incoherence spreads the mass of  $U_t, V_t$  evenly so that the projection onto  $T_t$  is well conditioned, while the random sparse support ensures the  $\ell_\infty$  constraint is satisfied after the  $W_t$  correction with  $\lambda_t$  of the stated order.

**Matrix Freedman control.** Let  $S_m = \sum_{t=1}^m Z_t$  and  $V_m = \sum_{t=1}^m \mathbb{E}[Z_t^2 | \mathcal{F}_{t-1}]$ . Matrix Freedman (Tropp)(see [26]) yields for all  $x > 0$ :

$$\mathbb{P}\{\|S_m\|_2 \geq x, \|V_m\|_2 \leq \sigma^2\} \leq 2SA \exp\left(-\frac{x^2/2}{\sigma^2 + \alpha x/3}\right).$$

Choosing<sup>1</sup>

$$x = C \sqrt{\frac{K(SA + S) \log(SA/\delta)}{SA}}$$

and union-bounding over  $m \leq T$  gives the high-probability event on which

$$\max_{t \leq T} \|Y_t - Y_{t-1}\|_2 \leq \max_{m \leq T} \|S_m\|_2 \leq C \sqrt{\frac{K(SA + S) \log(SA/\delta)}{SA}}.$$

Together with the inductive bounds for  $Y_{t-1}$ , this ensures simultaneously

$$\|\mathcal{P}_{T_t^\perp}(Y_t)\|_2 \leq \frac{1}{2}, \quad \|\mathcal{P}_{\Omega_t^c}(Y_t)\|_\infty < \lambda_t$$

for all  $t \leq T$  on the same event (the second inequality follows because the  $\ell_\infty$  increments on  $\Omega_t^c$  are dominated by the operator-norm increments and  $\lambda_t$  is chosen at the stated  $(\log(SA))^{1/2}$  scale).

**Exact/noisy PCP recovery at step  $t$ .** Consider the convex program

$$(\widehat{L}_t, \widehat{S}_t) \in \arg \min_{L, S} \|L\|_* + \lambda_t \|S\|_1 \quad \text{s.t.} \quad L + S = \Delta P_t.$$

On the certificate event above,  $(L_t, S_t)$  is the *unique* solution when  $\Delta P_t$  is exactly  $L_t + S_t$  (standard PCP duality). In the incremental setting, one can view the algorithmic residual  $R_t$  (the mismatch to the previous estimate) as a small additive perturbation that is absorbed by stability of PCP: if  $L^\natural + S^\natural + W$  is observed with  $\|W\|_F = \varepsilon_t$ , then

$$\|\widehat{L}_t - L^\natural\|_F + \|\widehat{S}_t - S^\natural\|_F \leq C' \varepsilon_t,$$

for a universal  $C'$  (stable PCP). Applying this with  $(L^\natural, S^\natural) = (L_t, S_t)$  and  $W = 0$  shows exact recovery; with the small algorithmic perturbations incurred by the incremental update, it yields

$$\|\widehat{\Delta P}_t^L + \widehat{\Delta P}_t^S - \Delta P_t\|_F \leq C' \varepsilon_t.$$

<sup>1</sup>The dimension factor  $SA$  enters through the ambient operator-norm tail. The variance proxy scales like  $\sigma^2 \asymp K/SA$  under  $\mu$ -incoherence, while the bounded step size obeys  $\alpha \asymp \sqrt{K/SA}$ ; see Appendix B.2 in the paper.

**Bounding the perturbation and taking the maximum over  $t$ .** Along the entire run, the perturbations  $\varepsilon_t$  are controlled by the same certificate increments: the projection and sparse-support corrections produce innovation terms whose squared Frobenius accumulation is dominated (up to constants) by the variance proxy that entered the Freedman step. Therefore, on the certificate event,

$$\max_{t \leq T} \varepsilon_t \lesssim \sqrt{\frac{K(SA + S) \log(SA/\delta)}{SA}}.$$

Combining with the stability bound gives

$$\max_{t \leq T} \|\widehat{\Delta P}_t^L + \widehat{\Delta P}_t^S - \Delta P_t\|_F \leq CK \sqrt{\frac{(SA + S) \log(SA/\delta)}{SA}},$$

where the additional factor  $K$  comes from the tangent-space dimension in the innovation bound (each update affects at most  $O(K)$  directions).

**Computational cost.** Alg. 2 updates  $\widehat{U}, \widehat{\Sigma}, \widehat{V}$  by projecting  $\Delta P_t$  onto the current subspace, QR on the residual block, and an SVD of a  $(2K) \times (2K)$  inner matrix, which totals  $\mathcal{O}(SA \cdot K + S \cdot K + K^3) = \mathcal{O}(SA \cdot S \cdot K)$  per step when accounting for the  $(SA) \times S$  shape.

This completes the proof.  $\square$

## C Bias-correction details (Lemma 3)

**Lemma 3** (Estimator accuracy). Fix  $(s, a)$  and a time  $t > W_v$ . Define

$$V_{p,t}^2(s, a) := \frac{1}{W_v} \sum_{i=t-W_v}^{t-1} \|p_i(\cdot|s, a) - p_{i-1}(\cdot|s, a)\|_1^2,$$

and let the bias-corrected local-variation estimator be

$$\widehat{V}(s, a, t) := \max \left\{ 0, \underbrace{\frac{1}{W_v} \sum_{i=t-W_v}^{t-1} \|\widehat{p}_i(\cdot|s, a) - \widehat{p}_{i-1}(\cdot|s, a)\|_1^2}_{\widehat{V}_{\text{raw}}} - \underbrace{\frac{C_0 S \log(16SAT/\delta)}{W_v} \sum_{i=t-W_v}^{t-1} \frac{1}{N_i^+(s, a)}}_{\text{bias term}} \right\}.$$

There exists an absolute constant  $C_0 \geq 1$  such that the following holds. On an event of probability at least  $1 - \delta/(8SAT)$ , for every  $(s, a)$  and every  $t$ ,

$$\frac{1}{3} V_{p,t}^2(s, a) - \Gamma_t(s, a) \leq \widehat{V}(s, a, t) \leq 3 V_{p,t}^2(s, a) + \Gamma_t(s, a), \quad (5)$$

where

$$\Gamma_t(s, a) := \frac{C_1 S \log(16SAT/\delta)}{W_v} \sum_{i=t-W_v}^{t-1} \frac{1}{N_i^+(s, a)}$$

for an absolute constant  $C_1$ .

In particular, if the local signal-to-noise condition

$$V_{p,t}^2(s, a) \geq 6 \Gamma_t(s, a)$$

holds, then the purely multiplicative bounds stated in the main text follow:

$$\frac{1}{3} V_{p,t}^2(s, a) \leq \widehat{V}(s, a, t) \leq 3 V_{p,t}^2(s, a).$$

*Proof.* Write, for brevity,  $p_i := p_i(\cdot|s, a)$ ,  $\widehat{p}_i := \widehat{p}_i(\cdot|s, a)$  and  $N_i^+ := N_i^+(s, a)$ . Let the sampling errors be  $\varepsilon_i := \widehat{p}_i - p_i$  and the true local change be  $u_i := p_i - p_{i-1}$ . Then

$$\widehat{p}_i - \widehat{p}_{i-1} = u_i + (\varepsilon_i - \varepsilon_{i-1}).$$

For each  $i$ , conditional on the past,  $\hat{p}_i$  is the empirical distribution of  $N_i^+$  multinomial samples supported on  $S$  states, so by a standard vector DKW/Hoeffding bound for the  $\ell_1$  norm (e.g. union bound over coordinates and Massart's tightening),

$$\|\varepsilon_i\|_1 \leq 2\sqrt{\frac{S \log(16SAT/\delta)}{N_i^+}} \quad \text{for all } i \in [t - W_v, t - 1], \quad (6)$$

with probability at least  $1 - \delta/(16SAT)$  (for the fixed  $(s, a, t)$  in question). Squaring in (6) and using the union bound again (over the  $W_v$  indices) yields the simultaneous bound

$$\|\varepsilon_i\|_1^2 \leq \frac{C S \log(16SAT/\delta)}{N_i^+} \quad \forall i \in [t - W_v, t - 1] \quad (7)$$

on an event of probability at least  $1 - \delta/(8SAT)$ , for an absolute constant  $C$ .<sup>2</sup>

For any vectors  $x, y$  we use

$$\|x + y\|_1^2 \leq 2\|x\|_1^2 + 2\|y\|_1^2, \quad \|x + y\|_1^2 \geq \frac{1}{2}\|x\|_1^2 - \|y\|_1^2,$$

the second inequality being a consequence of  $(a - b)^2 \geq \frac{1}{2}a^2 - b^2$  with  $a = \|x\|_1$ ,  $b = \|y\|_1$ . Apply them with  $x = u_i$  and  $y = \varepsilon_i - \varepsilon_{i-1}$  and use  $\|\varepsilon_i - \varepsilon_{i-1}\|_1 \leq \|\varepsilon_i\|_1 + \|\varepsilon_{i-1}\|_1$  plus  $(\alpha + \beta)^2 \leq 2(\alpha^2 + \beta^2)$  to obtain

$$\|\hat{p}_i - \hat{p}_{i-1}\|_1^2 \leq 2\|u_i\|_1^2 + 4(\|\varepsilon_i\|_1^2 + \|\varepsilon_{i-1}\|_1^2), \quad (8)$$

$$\|\hat{p}_i - \hat{p}_{i-1}\|_1^2 \geq \frac{1}{2}\|u_i\|_1^2 - 2(\|\varepsilon_i\|_1^2 + \|\varepsilon_{i-1}\|_1^2). \quad (9)$$

Define the “raw” average  $\hat{V}_{\text{raw}} = \frac{1}{W_v} \sum_{i=t-W_v}^{t-1} \|\hat{p}_i - \hat{p}_{i-1}\|_1^2$  and recall  $V_{p,t}^2 = \frac{1}{W_v} \sum_{i=t-W_v}^{t-1} \|u_i\|_1^2$ . Summing (8) over  $i$  and dividing by  $W_v$  (counting each  $\|\varepsilon_i\|_1^2$  at most twice) gives

$$\hat{V}_{\text{raw}} \leq 2V_{p,t}^2 + \frac{8}{W_v} \sum_{i=t-W_v}^{t-1} \|\varepsilon_i\|_1^2.$$

Similarly, from (9),

$$\hat{V}_{\text{raw}} \geq \frac{1}{2}V_{p,t}^2 - \frac{4}{W_v} \sum_{i=t-W_v}^{t-1} \|\varepsilon_i\|_1^2.$$

Subtract the chosen bias term  $\frac{C_0 S \log(16SAT/\delta)}{W_v} \sum_i \frac{1}{N_i^+}$  and then apply the high-probability bound (7). On the event from Step 1,

$$\begin{aligned} \hat{V} &= \max \left\{ 0, \hat{V}_{\text{raw}} - \frac{C_0 S \log(16SAT/\delta)}{W_v} \sum_i \frac{1}{N_i^+} \right\} \\ &\leq 2V_{p,t}^2 + (8C - C_0) \frac{S \log(16SAT/\delta)}{W_v} \sum_i \frac{1}{N_i^+}, \\ \hat{V} &\geq \frac{1}{2}V_{p,t}^2 - (4C + C_0) \frac{S \log(16SAT/\delta)}{W_v} \sum_i \frac{1}{N_i^+}. \end{aligned}$$

Choose, e.g.,  $C_0 = 8C$  to symmetrize constants, absorb fixed multiples into  $C_1$ , and relax  $\frac{1}{2}$  and 2 to  $\frac{1}{3}$  and 3 (which only weakens the inequalities). This yields the two-sided bound (5) with  $\Gamma_t(s, a) = \frac{C_1 S \log(16SAT/\delta)}{W_v} \sum_i \frac{1}{N_i^+(s, a)}$ .

If  $V_{p,t}^2(s, a) \geq 6\Gamma_t(s, a)$ , then the lower (resp. upper) inequality in (5) implies  $\hat{V}(s, a, t) \geq \frac{1}{2}V_{p,t}^2 - \Gamma_t \geq \frac{1}{3}V_{p,t}^2$  and  $\hat{V}(s, a, t) \leq 2V_{p,t}^2 + \Gamma_t \leq 3V_{p,t}^2$ , completing the claim.  $\square$

<sup>2</sup>Any  $C \geq 4$  works; we keep constants explicit but not optimized.



## D Proof of Lemma 4

**Lemma 4** (Total widening). Let

$$\eta(s, a, t) = \min\left\{1, c\sqrt{\widehat{V}(s, a, t)/N_t^+(s, a)}\right\}, \quad c = 2\sqrt{2S \log \frac{4SAT}{\delta}},$$

where  $N_t^+(s, a)$  is the number of visits to  $(s, a)$  up to time  $t$ , and  $\widehat{V}$  is the bias-corrected local-variation estimator from Section 6. Then, with probability at least  $1 - \delta/8$ ,

$$\sum_{t=1}^T \eta(s_t, a_t, t) \leq C \sqrt{S \log \frac{4SAT}{\delta}} \sqrt{1 + \log T} \sqrt{SA B_p} + C' SA \log \frac{SAT}{\delta}, \quad (10)$$

for universal constants  $C, C' > 0$ .

*Proof.* For each  $(s, a)$ , let  $t_1(s, a) < t_2(s, a) < \dots < t_{N_T(s, a)}(s, a)$  be its visit times, and set  $i_0 := c_0 \log(SAT/\delta)$ , where  $c_0$  is the constant from Lemma 3 (Estimator accuracy). By that lemma, for any triple  $(s, a, t)$  with  $N_t^+(s, a) \geq i_0$ ,

$$\frac{1}{3} V_{p, t}(s, a)^2 \leq \widehat{V}(s, a, t) \leq 3 V_{p, t}(s, a)^2$$

holds with probability at least  $1 - \delta/(8SAT)$ . A union bound over all at most  $SA \cdot T$  triples shows that there is an event  $\mathcal{E}$  of probability at least  $1 - \delta/8$  on which the two-sided accuracy above holds simultaneously for all  $(s, a, t)$  with  $N_t^+(s, a) \geq i_0$ .

Fix  $(s, a)$ . For the first  $i_0 - 1$  visits, we only know  $\eta \leq 1$ , hence

$$\sum_{i=1}^{\min\{N_T(s, a), i_0-1\}} \eta(s, a, t_i(s, a)) \leq i_0 - 1.$$

Summing this over  $(s, a)$  contributes at most  $SA(i_0 - 1) = \mathcal{O}(SA \log(SAT/\delta))$  to the total in (10).

For the “mature” visits  $i \geq i_0$ , on  $\mathcal{E}$  we have

$$\eta(s, a, t_i(s, a)) = \min\left\{1, c\sqrt{\widehat{V}(s, a, t_i(s, a))/i}\right\} \leq c\sqrt{\widehat{V}(s, a, t_i(s, a))/i} \leq c\sqrt{3} \frac{V_{p, t_i(s, a)}(s, a)}{\sqrt{i}}.$$

By Cauchy–Schwarz and the bound  $\sum_{i=i_0}^n \frac{1}{i} \leq 1 + \log n$ ,

$$\begin{aligned} \sum_{i=i_0}^{N_T(s, a)} \eta(s, a, t_i(s, a)) &\leq c\sqrt{3} \sum_{i=i_0}^{N_T(s, a)} \frac{V_{p, t_i(s, a)}(s, a)}{\sqrt{i}} \\ &\leq c\sqrt{3} \left( \sum_{i=i_0}^{N_T(s, a)} V_{p, t_i(s, a)}(s, a)^2 \right)^{1/2} \left( \sum_{i=i_0}^{N_T(s, a)} \frac{1}{i} \right)^{1/2} \\ &\leq c\sqrt{3(1 + \log T)} \left( \sum_{i=1}^{N_T(s, a)} V_{p, t_i(s, a)}(s, a)^2 \right)^{1/2}. \end{aligned}$$

Another application of Cauchy–Schwarz yields

$$\begin{aligned} \sum_{(s, a)} \sum_{i=i_0}^{N_T(s, a)} \eta(s, a, t_i(s, a)) &\leq c\sqrt{3(1 + \log T)} \sum_{(s, a)} \left( \sum_{i=1}^{N_T(s, a)} V_{p, t_i(s, a)}(s, a)^2 \right)^{1/2} \\ &\leq c\sqrt{3(1 + \log T)} \sqrt{SA} \left( \sum_{(s, a)} \sum_{i=1}^{N_T(s, a)} V_{p, t_i(s, a)}(s, a)^2 \right)^{1/2}. \end{aligned}$$

Because the visits  $\{t_i(s, a)\}$  partition  $\{1, \dots, T\}$ , the double sum equals  $\sum_{t=1}^T V_{p,t}(s_t, a_t)^2$ . Each row-wise  $\ell_1$  change is a distance between two probability vectors, hence  $0 \leq V_{p,t}(s, a) \leq 2$  and so  $V_{p,t}(s, a)^2 \leq 2V_{p,t}(s, a)$ . Therefore

$$\sum_{t=1}^T V_{p,t}(s_t, a_t)^2 \leq 2 \sum_{t=1}^T V_{p,t}(s_t, a_t) \leq 2 \sum_{t=1}^T \max_{s,a} V_{p,t}(s, a) = 2B_p.$$

Putting the early-visit contribution together with the bound from Step 3 and recalling  $c = 2\sqrt{2S \log(4SAT/\delta)}$ ,

$$\begin{aligned} \sum_{t=1}^T \eta(s_t, a_t, t) &\leq SA(i_0 - 1) + 2\sqrt{2S \log \frac{4SAT}{\delta}} \sqrt{3(1 + \log T)} \sqrt{SA} \sqrt{2B_p} \\ &\leq C' SA \log \frac{SAT}{\delta} + C \sqrt{S \log \frac{4SAT}{\delta}} \sqrt{1 + \log T} \sqrt{SA B_p}, \end{aligned}$$

which is precisely (10). This completes the proof.  $\square$

## Forecasting error analysis: proof of Proposition 2

**Proposition 2** (Prediction error). Fix  $(s, a)$  and write  $p_t := p_t(\cdot \mid s, a) \in \mathbb{R}^S$ . Under Assumption 1, suppose the time coefficients are  $\beta$ -smooth, i.e.  $|u_k(t+1) - u_k(t)| \leq \beta$  for all  $k$ , with  $\beta K \leq \frac{1}{2}$ . Define the one-step forecast

$$\hat{p}_{t+1}^{\text{pred}} := \hat{p}_t + \sum_{k=1}^{\hat{K}_t} \hat{u}_k^{\text{pred}} \hat{v}_k(s, a) \hat{w}_k,$$

followed by projection onto the probability simplex. Then there exists a universal constant  $C > 0$  such that, with probability at least  $1 - \delta/(8SAT)$ ,

$$\|\hat{p}_{t+1}^{\text{pred}} - p_{t+1}\|_1 \leq \|p_{t+1} - p_t\|_1 + \beta K + C \sqrt{\frac{K S \log(8SAT/\delta)}{N_t^+(s, a)}}. \quad (11)$$

Moreover, if the structured change satisfies the rowwise no-cancellation

$$\left\| \sum_{k=1}^K u_k(t) v_k(s, a) w_k \right\|_1 \geq c_* \sum_{k=1}^K |u_k(t)| \quad \text{for some } c_* \in (0, 1],$$

then

$$\|\hat{p}_{t+1}^{\text{pred}} - p_{t+1}\|_1 \leq \left(1 + \frac{\beta K}{c_*}\right) \|p_{t+1} - p_t\|_1 + C \sqrt{\frac{K S \log(8SAT/\delta)}{N_t^+(s, a)}}.$$

This is the statement proved in the appendix of the paper—.

*Proof.* Abbreviate  $p_t := p_t(\cdot \mid s, a)$ ,  $\hat{p}_t := \hat{p}_t(\cdot \mid s, a)$ , and recall the structured variation model on the row  $(s, a)$ :

$$p_{t+1} - p_t = \sum_{k=1}^K u_k(t) v_k(s, a) w_k + \epsilon_t(s, a), \quad \|w_k\|_1 \leq 1, \quad |v_k(s, a)| \leq 1. \quad (12)$$

Write

$$\hat{p}_{t+1}^{\text{pred}} - p_{t+1} = \underbrace{(\hat{p}_t - p_t)}_{E_{\text{emp}}} + \underbrace{\sum_{k=1}^{\hat{K}_t} \hat{u}_k^{\text{pred}} \hat{v}_k(s, a) \hat{w}_k - \sum_{k=1}^K u_k(t) v_k(s, a) w_k}_{E_{\text{fac}}} - \underbrace{\epsilon_t(s, a)}_{E_{\text{shk}}}. \quad (13)$$

Hence

$$\|\hat{p}_{t+1}^{\text{pred}} - p_{t+1}\|_1 \leq \|E_{\text{emp}}\|_1 + \|E_{\text{fac}}\|_1 + \|E_{\text{shk}}\|_1, \quad (14)$$

By Massart–DKW for multinomial means and a union bound over  $S$  next states,

$$\|E_{\text{emp}}\|_1 = \|\hat{p}_t - p_t\|_1 \leq 2\sqrt{\frac{S \log(8SAT/\delta)}{N_t^+(s, a)}} \quad (15)$$

with probability at least  $1 - \delta/(8SAT)$ ;

Insert and subtract the true factors:

$$\|E_{\text{fac}}\|_1 \leq \underbrace{\left\| \sum_{k=1}^K (\hat{u}_k^{\text{pred}} - u_k(t)) v_k(s, a) w_k \right\|_1}_{=: T_{\text{coef}}} + \underbrace{\left\| \sum_{k=1}^{\hat{K}_t} \hat{u}_k^{\text{pred}} (\hat{v}_k(s, a) \hat{w}_k - v_k(s, a) w_k) \right\|_1}_{=: T_{\text{sub}}}, \quad (16)$$

(a) *Coefficient drift and one-step forecasting.* Add and subtract  $u_k(t+1)$  and use  $|v_k(s, a)| \leq 1$ ,  $\|w_k\|_1 \leq 1$ :

$$T_{\text{coef}} \leq \sum_{k=1}^K |\hat{u}_k^{\text{pred}} - u_k(t+1)| + \sum_{k=1}^K |u_k(t+1) - u_k(t)|. \quad (17)$$

By the  $\beta$ -smoothness of  $u_k(\cdot)$ , the second sum is  $\leq \beta K$ . It remains to control the *forecast/estimation* term  $\sum_{k=1}^K |\hat{u}_k^{\text{pred}} - u_k(t+1)|$ .

We will prove the following result:

Fix  $(s, a)$  and time  $t$ . Suppose  $\hat{u}_k^{\text{pred}}$  is any one-step predictor built from the same  $N_t^+(s, a)$  samples that form  $\hat{p}_t(\cdot | s, a)$  (e.g. the naive choice  $\hat{u}_k^{\text{pred}} = \hat{u}_k(t)$ , or an AR(1)/ES update computed from the past estimates  $\hat{u}_k$ ). Then, with probability at least  $1 - \delta/(8SAT)$ ,

$$\sum_{k=1}^K |\hat{u}_k^{\text{pred}} - u_k(t+1)| \leq C_1 \sqrt{\frac{K S \log(8SAT/\delta)}{N_t^+(s, a)}}. \quad (18)$$

We first separate *forecasting* from *estimation* error by writing

$$|\hat{u}_k^{\text{pred}} - u_k(t+1)| \leq |\hat{u}_k^{\text{pred}} - \hat{u}_k(t)| + |\hat{u}_k(t) - u_k(t)| + |u_k(t) - u_k(t+1)|.$$

Summing over  $k$  and using the  $\beta$ -smoothness gives

$$\sum_{k=1}^K |\hat{u}_k^{\text{pred}} - u_k(t+1)| \leq \underbrace{\sum_{k=1}^K |\hat{u}_k^{\text{pred}} - \hat{u}_k(t)|}_{\text{one-step forecast on past estimates}} + \underbrace{\sum_{k=1}^K |\hat{u}_k(t) - u_k(t)|}_{\text{estimation from } N_t^+(s, a)} + \beta K.$$

The first sum depends only on the (noise-free) sequence of past *estimates* and is bounded by a constant multiple (built into  $C_1$ ) of the second; Hence it suffices to bound the *estimation* sum  $\sum_k |\hat{u}_k(t) - u_k(t)|$ .

Let  $\Delta_t := p_t - p_{t-1}$  and  $\hat{\Delta}_t := \hat{p}_t - \hat{p}_{t-1}$ . By (12),  $\Delta_t = \sum_{k=1}^K u_k(t) v_k(s, a) w_k + \epsilon_{t-1}(s, a)$ . All natural coefficient estimators  $\hat{u}(t) = (\hat{u}_1(t), \dots, \hat{u}_K(t))$  used for forecasting are constructed from the same empirical row  $\hat{\Delta}_t$  (e.g. least squares or a linear scoring rule). Such estimators are Lipschitz in the data:

$$\|\hat{u}(t) - u(t)\|_2 \leq L \|\hat{\Delta}_t - \Delta_t\|_2 \quad \text{with } L = O(1),$$

because the dictionary columns  $v_k(s, a) w_k$  have  $\ell_2$ -norms  $\leq \|w_k\|_1 \leq 1$  and the Gram operator is well-conditioned up to a universal constant absorbed in  $L$ . (Any stable linear/M-estimation procedure enjoys such an  $L$ ; the constant is folded into  $C_1$ .)

By Cauchy–Schwarz,

$$\sum_{k=1}^K |\hat{u}_k(t) - u_k(t)| \leq \sqrt{K} \|\hat{u}(t) - u(t)\|_2 \leq \sqrt{K} L \|\hat{\Delta}_t - \Delta_t\|_2.$$

Finally, by Massart–DKW applied to *both*  $\hat{p}_t$  and  $\hat{p}_{t-1}$  and a union bound,

$$\|\hat{\Delta}_t - \Delta_t\|_2 \leq \|\hat{p}_t - p_t\|_2 + \|\hat{p}_{t-1} - p_{t-1}\|_2 \leq C' \sqrt{\frac{S \log(8SAT/\delta)}{N_t^+(s, a)}}$$

for a universal  $C'$ . Collecting the pieces and absorbing  $L$  and  $C'$  into  $C_1$  yields (18).

Combining the result at 18 with the  $\beta K$  bound gives

$$T_{\text{coef}} \leq \beta K + C_1 \sqrt{\frac{K S \log(8SAT/\delta)}{N_t^+(s, a)}}, \quad (19)$$

(b) *Subspace (factor) estimation error.* For each  $k$ ,

$$\|\hat{v}_k(s, a) \hat{w}_k - v_k(s, a) w_k\|_1 \leq \sqrt{S} \|\hat{v}_k \hat{w}_k^\top - v_k w_k^\top\|_{F, \text{row}(s, a)} \leq \sqrt{S} \|\hat{v}_k \hat{w}_k^\top - v_k w_k^\top\|_F.$$

Summing  $k$  and invoking Lemma 2 (randomized SVD with power iterations) together with standard concentration for the empirical increments forming  $X_t = [\Delta \hat{P}_{t-W+1}, \dots, \Delta \hat{P}_t]$  yields

$$T_{\text{sub}} \leq C_2 \sqrt{\frac{K S \log(8SAT/\delta)}{N_t^+(s, a)}}, \quad (20)$$

matching equation (20) in the paper– and using the RSVD constants detailed earlier (Appendix A).

From (12),  $\|E_{\text{shk}}\|_1 = \|\epsilon_t(s, a)\|_1 \leq \|p_{t+1} - p_t\|_1$  since  $p_{t+1} - p_t$  decomposes into the structured part plus  $\epsilon_t(s, a)$  in  $\ell_1$ .

Using (14), (15), (19), and (20), and absorbing the purely statistical term  $\|E_{\text{emp}}\|_1$  into the  $C\sqrt{KS \log / N_t^+}$  term (by enlarging  $C$ ), we obtain

$$\|\hat{p}_{t+1}^{\text{pred}} - p_{t+1}\|_1 \leq \|p_{t+1} - p_t\|_1 + \beta K + C \sqrt{\frac{K S \log(8SAT/\delta)}{N_t^+(s, a)}},$$

which is exactly (11) and agrees with (11) in the appendix.

If additionally  $\|\sum_k u_k(t) v_k(s, a) w_k\|_1 \geq c_\star \sum_k |u_k(t)|$ , then  $\beta K \leq (\beta K / c_\star) \|p_{t+1} - p_t\|_1$ , so the additive  $\beta K$  term is dominated by a factor  $(\beta K / c_\star) \|p_{t+1} - p_t\|_1$ .  $\square$

## E Shrinkage optimality: proof of Theorem 1

**Theorem 1** (Near-optimal risk). Let  $\hat{p}_t \in \Delta^{S-1}$  be the empirical transition estimate from  $N_t^+$  samples for a fixed  $(s, a)$  at time  $t$ , and let  $\hat{p}_t^{\text{pred}}$  be any (possibly biased) forecast built from past data only. For  $\lambda \in [0, 1]$  define the shrinkage estimator  $\tilde{p}_t(\lambda) = (1 - \lambda)\hat{p}_t + \lambda\hat{p}_t^{\text{pred}}$  and its  $\ell_2$ -risk  $R_t(\lambda) := \mathbb{E}[\|\tilde{p}_t(\lambda) - p_t\|_2^2]$ . Assume:

- (A1) **Asymptotic orthogonality:**  $\mathbb{E}[\langle \hat{p}_t - p_t, \hat{p}_t^{\text{pred}} - p_t \rangle] = o(1/N_t^+)$  (e.g. holds if the forecast uses only data independent of the  $N_t^+$  samples that form  $\hat{p}_t$ ; sample splitting suffices).
- (A2) **Bounded forecast risk:**  $b_t := \mathbb{E}[\|\hat{p}_t^{\text{pred}} - p_t\|_2^2]$  is finite and bounded away from 0 along the considered times ( $\inf_t b_t > 0$  is enough).

(A3) **Consistent plug-in estimators:**

$$\hat{a}_t := \frac{1 - \|\hat{p}_t\|_2^2}{N_t^+} \xrightarrow{p} a_t := \mathbb{E}[\|\hat{p}_t - p_t\|_2^2] = \frac{1 - \|p_t\|_2^2}{N_t^+},$$

and, with a window  $W_f \rightarrow \infty$ ,

$$\hat{b}_t := \frac{1}{W_f} \sum_{i=t-W_f}^{t-1} \left( \|\hat{p}_i^{\text{pred}} - \hat{p}_i\|_2^2 - \frac{1 - \|\hat{p}_i\|_2^2}{N_i^+} \right) \xrightarrow{p} b_t.$$

Let the data-driven weight be  $\hat{\lambda}_t := \hat{a}_t / (\hat{a}_t + \hat{b}_t)$  and the oracle weight be  $\lambda_t^* := a_t / (a_t + b_t)$ . Then, as  $N_t^+ \rightarrow \infty$  and  $W_f \rightarrow \infty$  (no rate relation between them is needed),

$$\frac{R_t(\hat{\lambda}_t)}{R_t(\lambda_t^*)} = 1 + o(1).$$

*Proof. Step 1* Write  $X_t := \hat{p}_t - p_t$  and  $Y_t := \hat{p}_t^{\text{pred}} - p_t$ . By definition,

$$R_t(\lambda) = \mathbb{E}[\|(1 - \lambda)X_t + \lambda Y_t\|_2^2] = (1 - \lambda)^2 a_t + \lambda^2 b_t + 2\lambda(1 - \lambda)c_t,$$

where  $a_t = \mathbb{E}\|X_t\|_2^2$ ,  $b_t = \mathbb{E}\|Y_t\|_2^2$  and  $c_t = \mathbb{E}\langle X_t, Y_t \rangle$ . Assumption (A1) gives  $c_t = o(1/N_t^+)$ , hence  $c_t$  is negligible relative to  $a_t = \Theta(1/N_t^+)$ . Therefore the minimizer is

$$\lambda_t^* = \frac{a_t - c_t}{a_t + b_t - 2c_t} = \frac{a_t}{a_t + b_t} + o(1/N_t^+)$$

and the oracle risk satisfies

$$R_t(\lambda_t^*) = \frac{(a_t - c_t)(b_t - c_t)}{a_t + b_t - 2c_t} = \frac{a_t b_t}{a_t + b_t} (1 + o(1)) \sim a_t \quad (N_t^+ \rightarrow \infty),$$

since  $b_t$  is bounded away from 0 by (A2). In particular,  $R_t(\lambda_t^*) = \Theta(1/N_t^+)$ .

**Step 2** Define  $g(a, b) := a/(a + b)$ . By (A3),  $\hat{a}_t \rightarrow a_t$  and  $\hat{b}_t \rightarrow b_t$  in probability, with  $\hat{a}_t - a_t = O_p(N_t^{-3/2})$  (delta method for  $\hat{a}_t = (1 - \|\hat{p}_t\|_2^2)/N_t^+$ ) and  $\hat{b}_t - b_t = O_p(W_f^{-1/2})$  (window average). A first-order expansion of  $g$  at  $(a_t, b_t)$  yields

$$\hat{\lambda}_t - \lambda_t^* = \frac{\partial g}{\partial a}(a_t, b_t)(\hat{a}_t - a_t) + \frac{\partial g}{\partial b}(a_t, b_t)(\hat{b}_t - b_t) + o_p(|\hat{a}_t - a_t| + |\hat{b}_t - b_t|).$$

Because  $\frac{\partial g}{\partial a} = \frac{b}{(a+b)^2} = \Theta(1)$  and  $\frac{\partial g}{\partial b} = -\frac{a}{(a+b)^2} = \Theta(a_t) = \Theta(1/N_t^+)$ ,

$$\hat{\lambda}_t - \lambda_t^* = O_p(N_t^{-3/2}) + O_p((N_t^+)^{-1} W_f^{-1/2}) = o_p(N_t^{-1/2}).$$

In particular,  $\hat{\lambda}_t \rightarrow \lambda_t^*$  in probability.<sup>3</sup>

**Step 3** Since  $R_t$  is twice differentiable and  $R_t'(\lambda_t^*) = 0$ ,

$$R_t(\hat{\lambda}_t) - R_t(\lambda_t^*) = \frac{1}{2} R_t''(\xi_t) (\hat{\lambda}_t - \lambda_t^*)^2, \quad \xi_t \in \text{conv}\{\hat{\lambda}_t, \lambda_t^*\}.$$

Moreover,  $R_t''(\lambda) = 2(a_t + b_t) - 4c_t = 2(b_t + o(1))$ , hence  $R_t''(\xi_t) = \Theta(1)$  by (A2) and (A1). Combining with Step 2,

$$R_t(\hat{\lambda}_t) - R_t(\lambda_t^*) = O_p(N_t^{-3}) + O_p((N_t^+)^{-2} W_f^{-1}).$$

Finally, divide by  $R_t(\lambda_t^*) = \Theta(1/N_t^+)$  from Step 1:

$$\frac{R_t(\hat{\lambda}_t)}{R_t(\lambda_t^*)} - 1 = O_p(N_t^{-2}) + O_p((N_t^+)^{-1} W_f^{-1}) = o(1)$$

as soon as  $W_f \rightarrow \infty$  (no relative rate to  $N_t^+$  is needed). This proves the claim.  $\square$

<sup>3</sup>If one replaces  $\hat{b}_t$  by the uncorrected  $\frac{1}{W_f} \sum_i \|\hat{p}_i^{\text{pred}} - \hat{p}_i\|_2^2$ , its limit is  $b_t + a_t$ ; then  $\hat{\lambda}_t \rightarrow a_t/(a_t + b_t + a_t)$  differs from  $\lambda_t^*$  by  $O(a_t) = O(1/N_t^+)$ , hence still  $\hat{\lambda}_t - \lambda_t^* = o_p(N_t^{-1/2})$ , giving the same conclusion.

**Remark (on the plug-in MSE).** The windowed proxy  $\frac{1}{W_f} \sum_{i=t-W_f}^{t-1} \|\hat{p}_i^{\text{pred}} - \hat{p}_i\|_2^2$  converges to  $b_t + a_t$  because  $\mathbb{E}\|\hat{p}_i - p_i\|_2^2 = a_t$  and the cross-term is  $o(1)$  by (A1). Subtracting the known multinomial variance proxy  $(1 - \|\hat{p}_i\|_2^2)/N_i^+$  yields the consistent  $\hat{b}_t$  used in (A3). Using the uncorrected proxy leaves the theorem unchanged, since the induced bias in  $\hat{\lambda}_t$  is  $O(a_t) = O(1/N_t^+)$  and the ratio  $R_t(\hat{\lambda}_t)/R_t(\lambda_t^*)$  still tends to 1.

## F Full regret proof

**Episode notation** Episode  $m$  starts at  $\tau(m)$ , ends at  $\tau(m+1) - 1$ , and follows optimistic policy  $\tilde{\pi}_m$ .

### F.1 Decomposition

For  $t \in$  episode  $m$

$$\rho_t^* - r_t \leq \underbrace{(\rho_t^* - \tilde{\rho}_m)}_{A_t} + \underbrace{(\tilde{\rho}_m - \tilde{r}_m(s_t, a_t))}_{B_t} + \underbrace{(\tilde{r}_m - r_t)}_{C_t}.$$

Term  $B_t \leq 1/\sqrt{\tau(m)}$  by value-iteration tolerance. Terms  $A_t$  and  $C_t$  are bounded by variation  $\text{var}_{\{r,p\}}$ , statistical radii, widening  $\eta$ , and approximation approx exactly as in Lemma 5.

### F.2 Summation over $t \leq T$

1. Doubling episodes  $\Rightarrow \sum B_t \leq 2\sqrt{T \log T}$ .
2. Reward/transition variation budget  $\Rightarrow \sum \text{var}_{r,t} \leq B_r$  and  $\sum \text{var}_{p,t} \leq B_p$ .
3. Statistical radii:  $\sum \text{rad}_r \leq \tilde{O}(\sqrt{SAT})$  and  $\sum \text{rad}_p \leq \tilde{O}(\sqrt{SAT})$ .
4. Widening: Lemma 4.
5. Approximation: RPCA + low-rank gives  $O(\delta_B B_p + \sqrt{KT \log T})$ .

Multiply the transition-related terms by  $D_{\max}$ , collect logarithms into  $\tilde{\mathcal{O}}$ , and obtain Theorem 2.  $\square$

### F.3 Detailed Regret Decomposition: Detail proof of Lemma 5

**Lemma 5** (Per-step regret). Fix an episode  $m$  with start time  $\tau = \tau(m)$  and policy  $\tilde{\pi}_m$  returned by EVI on the optimistic model constructed at time  $\tau$ . Let  $t \in [\tau, \tau(m+1) - 1]$ . Define

$$\text{var}_{r,t} := \max_{s,a} |r_t(s, a) - r_\tau(s, a)|, \quad \text{var}_{p,t} := \max_{s,a} \|p_t(\cdot|s, a) - p_\tau(\cdot|s, a)\|_1,$$

and let  $\text{rad}_{r,\tau}, \text{rad}_{p,\tau}$  be the reward/transition statistical radii at time  $\tau$ ,  $\eta = \eta(s_t, a_t, t)$  the adaptive widening, and approx the model-approximation slack. If EVI stops with tolerance  $\epsilon_\tau := 1/\sqrt{\tau}$ , then on a high-probability event of probability at least  $1 - \delta/2$ , for the action  $a_t = \tilde{\pi}_m(s_t)$  we have

$$\rho_t^* - r_t(s_t, a_t) \leq \epsilon_\tau + 2 \text{var}_{r,t} + 2D_{\max} \text{var}_{p,t} + 2 \text{rad}_{r,\tau} + 2D_{\max} (\text{rad}_{p,\tau} + \eta + \text{approx}).$$

*Proof. Good event and optimism.* At episode start  $\tau$  we form confidence sets (Algorithm 3) around the shrinkage centre  $\tilde{p}_\tau(\cdot|s, a)$ :

$$\mathcal{C}_\tau(s, a; t) := \left\{ p \in \Delta^{S-1} : \|p - \tilde{p}_\tau(\cdot|s, a)\|_1 \leq \text{rad}_{p,\tau}(s, a) + \eta(s, a, t) + \text{approx} \right\},$$

and reward intervals  $[\underline{r}_\tau, \bar{r}_\tau]$  with half-width  $\text{rad}_{r,\tau}$ . By standard concentration (multinomial for  $p$ , Hoeffding for  $r$ ) and the construction of  $\eta$ , there is an event  $\mathcal{E}$  of probability  $\geq 1 - \delta/2$  on which for all  $(s, a)$  and all  $t \geq \tau$ :

$$r_\tau(s, a) \in [\underline{r}_\tau(s, a), \bar{r}_\tau(s, a)], \quad p_t(\cdot|s, a) \in \mathcal{C}_\tau(s, a; t).$$

Let  $\tilde{M}_m = (\tilde{r}_m, \tilde{p}_m)$  be the optimistic MDP built at  $\tau$  by picking  $\tilde{r}_m(s, a) \in [\underline{r}_\tau, \bar{r}_\tau]$  and  $\tilde{p}_m(\cdot|s, a) \in \mathcal{C}_\tau(s, a; t)$  so as to maximize the value (EVI). On  $\mathcal{E}$  the true MDP at time  $\tau$  lies in the (unwidened) sets, hence the optimism principle implies

$$\rho_\tau^* \leq \tilde{\rho}_m, \tag{21}$$

where  $\tilde{\rho}_m$  is the optimal average reward in  $\tilde{M}_m$ .

**A Lipschitz bound in average reward.**  $\rho^\pi(M)$  denotes the average (per-step) reward, also called the *gain*, of policy  $\pi$  in the MDP  $M = (r, p)$ . Formally, if  $P^\pi(s, s') = p(s' \mid s, \pi(s))$  and  $r^\pi(s) = r(s, \pi(s))$ , then

$$\rho^\pi(M) = \lim_{T \rightarrow \infty} \frac{1}{T} \mathbb{E}_\pi \left[ \sum_{t=0}^{T-1} r^\pi(s_t) \right] = \sum_s d^\pi(s) r^\pi(s),$$

where  $d^\pi(s)$  denotes the stationary distribution of the Markov chain induced by policy  $\pi$ . For any communicating MDPs  $M = (r, p)$  and  $M' = (r', p')$  of diameter at most  $D_{\max}$  and any stationary policy  $\pi$ ,

$$|\rho^\pi(M) - \rho^\pi(M')| \leq \|r - r'\|_\infty + D_{\max} \|p - p'\|_{1, \infty}. \quad (22)$$

Indeed, take a bias function  $h'$  for  $(M', \pi)$  with  $\text{span}(h') \leq D_{\max}$  (obtainable by the standard hitting-time construction in communicating MDPs). The Poisson equation gives

$$\rho^\pi(M') + h'(s) = r'(s, \pi(s)) + p'(\cdot \mid s, \pi(s))^\top h'$$

for all  $s$ . Then

$$r(s, \pi(s)) + p(\cdot \mid s, \pi(s))^\top h' - h'(s) - \rho^\pi(M') = \underbrace{r(s, \pi(s)) - r'(s, \pi(s))}_{\leq \|r - r'\|_\infty} + \underbrace{(p - p')(\cdot \mid s, \pi(s))^\top h'}_{\leq \|p - p'\|_{1, \infty} \text{span}(h')}.$$

Taking the supremum over  $s$  and the infimum over  $h'$  (with  $\text{span}(h') \leq D_{\max}$ ) yields

$$\rho^\pi(M) \leq \rho^\pi(M') + \|r - r'\|_\infty + D_{\max} \|p - p'\|_{1, \infty},$$

and exchanging  $M, M'$  proves (22).

**From  $\rho_t^*$  to  $\tilde{\rho}_m$ .** Apply (22) with  $M_t = (r_t, p_t)$  and  $M_\tau = (r_\tau, p_\tau)$  under the *optimal* policy at time  $t$  to obtain

$$\rho_t^* - \rho_\tau^* \leq \text{var}_{r,t} + D_{\max} \text{var}_{p,t}. \quad (23)$$

Combining (23) with optimism (21) yields

$$\rho_t^* - \tilde{\rho}_m \leq \text{var}_{r,t} + D_{\max} \text{var}_{p,t}. \quad (24)$$

**EVI residual and one-step domination.** Let  $\tilde{h}_m$  be the bias function produced by EVI together with  $\tilde{\pi}_m$  for the optimistic model. By the EVI stopping rule with tolerance  $\epsilon_\tau = 1/\sqrt{\tau}$ , for every state  $s$ ,

$$\tilde{r}_m(s, \tilde{\pi}_m(s)) + \max_{p \in \mathcal{C}_\tau(s, \tilde{\pi}_m(s); t)} p^\top \tilde{h}_m - \tilde{h}_m(s) \geq \tilde{\rho}_m - \epsilon_\tau. \quad (25)$$

Evaluate (25) at  $s = s_t$  and note that, on  $\mathcal{E}$ , the *true* row  $p_t(\cdot \mid s_t, a_t)$  belongs to  $\mathcal{C}_\tau(s_t, a_t; t)$ . Hence

$$\tilde{\rho}_m - \tilde{r}_m(s_t, a_t) \leq \epsilon_\tau + (p_t(\cdot \mid s_t, a_t))^\top \tilde{h}_m - \tilde{h}_m(s_t). \quad (26)$$

**Replace  $\tilde{r}_m$  by  $r_t$ : reward part.** Add and subtract  $r_t(s_t, a_t)$  in (26) to get

$$\tilde{\rho}_m - r_t(s_t, a_t) \leq \epsilon_\tau + (\tilde{r}_m - r_t)(s_t, a_t) + (p_t(\cdot \mid s_t, a_t))^\top \tilde{h}_m - \tilde{h}_m(s_t).$$

Because  $\tilde{r}_m(s, a) \in [\underline{r}_\tau(s, a), \bar{r}_\tau(s, a)]$  and  $r_\tau(s, a)$  lies in the same interval, we have  $|\tilde{r}_m(s, a) - r_\tau(s, a)| \leq 2 \text{rad}_{r,\tau}(s, a)$ ; by definition of  $\text{var}_{r,t}$ ,  $|r_\tau(s, a) - r_t(s, a)| \leq \text{var}_{r,t}$ . Therefore

$$(\tilde{r}_m - r_t)(s_t, a_t) \leq 2 \text{rad}_{r,\tau} + \text{var}_{r,t}. \quad (27)$$

**Replace  $\tilde{p}_m$  by  $p_t$ : transition part.** Insert and subtract  $\tilde{p}_m(\cdot \mid s_t, a_t)$ :

$$(p_t - \tilde{p}_m)^\top \tilde{h}_m + \tilde{p}_m^\top \tilde{h}_m - \tilde{h}_m(s_t).$$

The last two terms are nonpositive by (25) (they are upper-bounded by  $\epsilon_\tau$  already accounted for), so it suffices to bound the deviation term  $|(p_t - \tilde{p}_m)^\top \tilde{h}_m| \leq \text{span}(\tilde{h}_m) \|p_t - \tilde{p}_m\|_1 \leq D_{\max} \|p_t - \tilde{p}_m\|_1$ . By

construction, both  $p_t(\cdot|s_t, a_t)$  and  $\tilde{p}_m(\cdot|s_t, a_t)$  lie in the *same* ball  $\|p - \tilde{p}_m\|_1 \leq \text{rad}_{p,\tau} + \eta + \text{approx}$  around the centre  $\tilde{p}_\tau(\cdot|s_t, a_t)$ ; hence

$$\|p_t - \tilde{p}_m\|_1 \leq 2(\text{rad}_{p,\tau} + \eta + \text{approx}). \quad (28)$$

(We may additionally add  $\text{var}_{p,t}$ , via  $\|p_t - \tilde{p}_m\|_1 \leq \|p_t - p_\tau\|_1 + \|p_\tau - \tilde{p}_m\|_1$ , which only increases the bound; we keep the symmetric  $2(\cdot)$  form induced by the common centre.)

Therefore

$$(p_t(\cdot|s_t, a_t))^\top \tilde{h}_m - \tilde{h}_m(s_t) \leq D_{\max} \cdot 2(\text{rad}_{p,\tau} + \eta + \text{approx}). \quad (29)$$

**Collect the pieces.** Combine (27)–(29) into (26):

$$\tilde{\rho}_m - r_t(s_t, a_t) \leq \epsilon_\tau + 2\text{rad}_{r,\tau} + \text{var}_{r,t} + 2D_{\max}(\text{rad}_{p,\tau} + \eta + \text{approx}).$$

Finally add (24):

$$\rho_t^* - r_t(s_t, a_t) \leq \epsilon_\tau + 2\text{var}_{r,t} + 2D_{\max}\text{var}_{p,t} + 2\text{rad}_{r,\tau} + 2D_{\max}(\text{rad}_{p,\tau} + \eta + \text{approx}),$$

which is the claimed inequality.  $\square$

#### F.4 Summation Analysis

We now analyze the sum of each term over all time steps  $t \leq T$ .

**Value Iteration Error** Using the doubling nature of the episodes and the fact that episode lengths are at most  $\sqrt{T}$ , we have:

$$\begin{aligned} \sum_{t=1}^T B_t &= \sum_{m=1}^M \sum_{t=\tau(m)}^{\tau(m+1)-1} \frac{1}{\sqrt{\tau(m)}} \\ &= \sum_{m=1}^M \frac{\tau(m+1) - \tau(m)}{\sqrt{\tau(m)}} \\ &\leq \sum_{m=1}^M \frac{2\tau(m)}{\sqrt{\tau(m)}} \\ &= 2 \sum_{m=1}^M \sqrt{\tau(m)} \\ &\leq 2\sqrt{T} \cdot M \end{aligned}$$

Since the number of episodes  $M$  is at most  $\mathcal{O}(\log T)$  due to the doubling condition, we get  $\sum B_t \leq 2\sqrt{T} \log T$ .

**Variation Terms** For the reward variation, we have:

$$\begin{aligned} \sum_{t=1}^T \text{var}_{r,t} &= \sum_{t=1}^T \max_{s,a} |r_t(s, a) - r_{\tau(m)}(s, a)| \\ &\leq \sum_{t=1}^T \sum_{i=\tau(m)}^{t-1} \max_{s,a} |r_{i+1}(s, a) - r_i(s, a)| \\ &\leq \sum_{i=1}^{T-1} \max_{s,a} |r_{i+1}(s, a) - r_i(s, a)| \cdot |\{t : i \geq \tau(m(t)), i < t\}| \end{aligned}$$

Each transition  $i$  contributes to at most one episode, and by the definition of the variation budget, we have  $\sum_{i=1}^{T-1} \max_{s,a} |r_{i+1}(s, a) - r_i(s, a)| \leq B_r$ . Therefore,  $\sum_{t=1}^T \text{var}_{r,t} \leq B_r$ .

A similar argument applies to the transition variation, giving  $\sum_{t=1}^T \text{var}_{p,t} \leq B_p$ .



**Statistical Radii** The statistical radius for rewards is defined as:

$$\text{rad}_{r,t}(s, a) = \sqrt{\frac{2 \log(4SAT/\delta)}{N_t(s, a)}}$$

Summing over all time steps and state-action pairs:

$$\begin{aligned} \sum_{t=1}^T \text{rad}_{r,\tau(m)}(s_t, a_t) &= \sum_{t=1}^T \sqrt{\frac{2 \log(4SAT/\delta)}{N_{\tau(m)}(s_t, a_t)}} \\ &\leq \sqrt{2 \log(4SAT/\delta)} \sum_{(s,a)}^{N_T(s,a)} \sum_{n=1} \frac{1}{\sqrt{n}} \\ &\leq \sqrt{2 \log(4SAT/\delta)} \sum_{(s,a)} 2\sqrt{N_T(s, a)} \\ &\leq 2\sqrt{2 \log(4SAT/\delta)} \sum_{(s,a)} \sqrt{N_T(s, a)} \end{aligned}$$

By Cauchy-Schwarz:

$$\begin{aligned} \sum_{(s,a)} \sqrt{N_T(s, a)} &\leq \sqrt{SA} \cdot \sqrt{\sum_{(s,a)} N_T(s, a)} \\ &= \sqrt{SA} \cdot \sqrt{T} \end{aligned}$$

Therefore,  $\sum_{t=1}^T \text{rad}_{r,\tau(m)}(s_t, a_t) \leq \mathcal{O}(\sqrt{SAT \log(SAT/\delta)})$ . A similar analysis applies to the transition radius, giving  $\sum_{t=1}^T \text{rad}_{p,\tau(m)}(s_t, a_t) \leq \mathcal{O}(\sqrt{S^2 AT \log(SAT/\delta)})$ .

**Adaptive Widening** By Lemma 4, we have:

$$\sum_{t=1}^T \eta(s_t, a_t, t) = \tilde{\mathcal{O}}(D_{\max} \sqrt{(B_r + B_p) K S T})$$

This bound exploits the low-rank structure of the environmental changes, resulting in a significant improvement over the uniform widening approach.

**Approximation Error** The approximation error comes from two sources: the randomized SVD and the incremental RPCA.

For the randomized SVD, by Lemma 2, the Frobenius norm error of the low-rank approximation is bounded by:

$$\|\mathbf{X}_t - \mathbf{U}\Sigma\mathbf{V}^T\|_F^2 \leq C_1 \min_{\text{rank} \leq \hat{K}_t} \|\mathbf{X}_t - \mathbf{A}\|_F^2$$

where  $C_1 = (2 + 4\sqrt{(\hat{K}_t + s)/(s-1)})^{4/(2q+1)}$ .

For the incremental RPCA, by Proposition 1, the error in recovering the low-rank and sparse components is bounded by:

$$\max_{t \leq T} \|\Delta P_t^L + \Delta P_t^S - \Delta P_t\|_F \leq C_2 \sqrt{\frac{K^2(SA + S) \log(SA/\delta)}{SA}}$$

where  $C_2$  is a constant.

For the sparse component, we have the bound  $\sum_t \max_{s,a} \|\epsilon_t(s, a, \cdot)\|_1 \leq \delta_B B_p$  from Assumption 1.

Combining these sources of error and summing over all time steps, we get:

$$\sum_{t=1}^T \text{approx}_t = \mathcal{O}(\delta_B B_p + \sqrt{KT \log(T)})$$

## F.5 Final Regret Bound

Combining all the terms and multiplying the transition-related terms by  $D_{\max}$ , we get:

$$\begin{aligned} \text{DynReg}_T &= \sum_{t=1}^T (\rho_t^* - r_t(s_t, a_t)) \\ &\leq 2\sqrt{T \log T} + 2B_r + 2D_{\max}B_p + \mathcal{O}(\sqrt{SAT \log(SAT/\delta)}) + \mathcal{O}(D_{\max}\sqrt{S^2 AT \log(SAT/\delta)}) \\ &\quad + \tilde{\mathcal{O}}(D_{\max}\sqrt{(B_r + B_p)KST}) + \mathcal{O}(D_{\max}\delta_B B_p + D_{\max}\sqrt{KT \log(T)}) \end{aligned}$$

The dominant terms are the statistical error  $\mathcal{O}(D_{\max}\sqrt{SAT \log(SAT/\delta)})$  and the adaptive widening  $\tilde{\mathcal{O}}(D_{\max}\sqrt{(B_r + B_p)KST})$ . Collecting the logarithmic factors into  $\tilde{\mathcal{O}}$ , we get the regret bound stated in Theorem 2:

$$\text{DynReg}_T = \tilde{\mathcal{O}}(D_{\max}\sqrt{SAT} + D_{\max}\sqrt{(B_r + B_p)KST} + D_{\max}\delta_B B_p)$$

## F.6 Optimality of the Regret Bound

The regret bound we obtain is nearly optimal in several aspects:

**Dependence on  $T$**  The  $\sqrt{T}$  dependence matches the lower bound for non-stationary bandits with variation budget constraints, which is  $\Omega(\sqrt{BT})$  where  $B$  is the variation budget. This suggests that our algorithm achieves the optimal rate in terms of the time horizon.

**Dependence on state-action space** The first term  $D_{\max}\sqrt{SAT}$  matches the lower bound for reinforcement learning in stationary environments, which is  $\Omega(D_{\max}\sqrt{SAT})$ . This indicates that our algorithm achieves the optimal dependence on the state and action space sizes in the absence of non-stationarity.

**Dependence on variation budgets** The second term  $D_{\max}\sqrt{(B_r + B_p)KST}$  shows that the regret scales with the square root of the variation budgets, which is optimal under the standard model of non-stationarity.

**Dependence on rank  $K$**  The dependence on the rank  $K$  is an improvement over previous algorithms that did not exploit low-rank structure. The factor  $\sqrt{K}$  replaces the factor  $\sqrt{SA}$  in the non-stationary term, resulting in a significant reduction in regret when  $K \ll SA$ .

**Residual term** The residual term  $D_{\max}\delta_B B_p$  accounts for the sparse shock component in our model. This term can be made arbitrarily small by setting  $\delta_B$  to a small value, at the cost of potentially increasing the rank  $K$  to capture more of the variation.

## F.7 Comparison to Previous Results

Our regret bound improves upon the regret bounds of previous algorithms for non-stationary reinforcement learning:

**SWUCRL2-CW** The sliding-window algorithm with uniform confidence widening achieves a regret bound of  $\tilde{\mathcal{O}}(D_{\max}(SAT)^{1/3}(B_r + B_p)^{2/3})$  or  $\tilde{\mathcal{O}}(D_{\max}S\sqrt{AT} + D_{\max}\sqrt{SAT(B_r + B_p)})$ . Our algorithm improves the dependence on  $T$  from  $T^{3/4}$  to  $\sqrt{T}$  and reduces the dependence on the state-action space from  $SA$  to  $K$  in the non-stationary term.

**Bandit-based approaches** Non-stationary bandit algorithms typically achieve regret bounds of the form  $\tilde{\mathcal{O}}(\sqrt{KBT})$  where  $K$  is the number of arms and  $B$  is the variation budget. Our algorithm generalizes this to the reinforcement learning setting while maintaining the optimal dependence on the time horizon and variation budgets.

In summary, our regret bound represents a significant improvement over existing results for non-stationary reinforcement learning, particularly in environments with low-rank structure in the dynamics changes.

## G Detailed algorithm implementation

### G.1 Confidence interval construction

The confidence intervals for rewards and transitions are constructed as follows:

**Reward confidence interval** For each state-action pair  $(s, a)$ , we define the confidence interval for the reward at time  $t$  as:

$$[\underline{r}_t(s, a), \bar{r}_t(s, a)] = [\hat{r}_t(s, a) - \text{rad}_{r,t}(s, a), \hat{r}_t(s, a) + \text{rad}_{r,t}(s, a)]$$

where  $\hat{r}_t(s, a)$  is the empirical average reward for  $(s, a)$  up to time  $t$ , and the confidence radius is:

$$\text{rad}_{r,t}(s, a) = \sqrt{\frac{2 \log(4SAT/\delta)}{N_t(s, a)}}$$

**Transition confidence interval** For the transition probabilities, we define the confidence set at time  $t$  as:

$$\mathcal{P}_t(s, a) = \{p : \|p - \tilde{p}_t(\cdot|s, a)\|_1 \leq \text{rad}_{p,t}(s, a) + \eta(s, a, t)\}$$

where  $\tilde{p}_t(\cdot|s, a)$  is the shrinkage estimator defined in Section 7, and the confidence radius has two components:

- $\text{rad}_{p,t}(s, a) = \sqrt{\frac{2S \log(4SAT/\delta)}{N_t(s, a)}}$  accounts for statistical uncertainty
- $\eta(s, a, t) = \min\{1, c\sqrt{\hat{V}(s, a, t)/N_t^+(s, a)}\}$  accounts for non-stationarity

### G.2 Extended Value Iteration

The Extended Value Iteration (EVI) algorithm computes an optimistic policy as follows:

---

#### Algorithm 4 Extended Value Iteration

---

**Require:** Confidence sets  $\{[\underline{r}_t(s, a), \bar{r}_t(s, a)]\}, \{\mathcal{P}_t(s, a)\}$ , tolerance  $\epsilon$

```

1: Initialize  $V_0(s) = 0$  for all  $s \in \mathcal{S}$ 
2:  $span \leftarrow \infty$ 
3: while  $span > \epsilon$  do
4:   for  $s \in \mathcal{S}$  do
5:     for  $a \in \mathcal{A}$  do
6:        $Q_k(s, a) \leftarrow \bar{r}_t(s, a) + \max_{p \in \mathcal{P}_t(s, a)} \sum_{s'} p(s') V_k(s')$ 
7:     end for
8:      $V_{k+1}(s) \leftarrow \max_a Q_k(s, a)$ 
9:      $\pi(s) \leftarrow \arg \max_a Q_k(s, a)$ 
10:   end for
11:    $span \leftarrow \max_s V_{k+1}(s) - \min_s V_{k+1}(s)$ 
12: end while
13: return  $\pi, span$ 

```

---

The inner maximization  $\max_{p \in \mathcal{P}_t(s, a)} \sum_{s'} p(s') V_k(s')$  can be solved efficiently by assigning as much probability as possible to the states with the highest values, subject to the constraint that  $p$  must be within distance  $\text{rad}_{p,t}(s, a) + \eta(s, a, t)$  of  $\tilde{p}_t(\cdot|s, a)$  in  $\ell_1$  norm.

### G.3 Factor tracking and forecasting

The algorithm maintains a buffer of recent transition changes and periodically updates the low-rank model. The key steps are:

**Buffer update** At each time step, we update the empirical transition estimates and compute the change:

$$\Delta \hat{P}_t = \hat{P}_t - \hat{P}_{t-1}$$

This change is added to a circular buffer of size  $W$ .

**Low-rank model update** Every  $W$  time steps, we:

1. Form the matrix  $\mathbf{X}_t = [\Delta \hat{P}_{t-W+1}, \dots, \Delta \hat{P}_t]$
2. Run Algorithm 1 (Randomized SVD) to obtain factors  $\mathbf{U}, \Sigma, \mathbf{V}$
3. Run Algorithm 2 (Incremental RPCA) to separate low-rank and sparse components
4. Extract time-varying coefficients  $\hat{u}_k(t-W+1), \dots, \hat{u}_k(t)$  for each factor  $k$

**Forecasting** For each factor  $k$ , we:

1. Fit multiple time-series models to the sequence  $\hat{u}_k(t-W+1), \dots, \hat{u}_k(t)$ :
  - Exponential smoothing:  $\hat{u}_k^{\text{ES}}(t+1) = \alpha u_k(t) + (1-\alpha)\hat{u}_k^{\text{ES}}(t)$
  - AR(1):  $\hat{u}_k^{\text{AR1}}(t+1) = \phi_0 + \phi_1 u_k(t)$
  - AR(2):  $\hat{u}_k^{\text{AR2}}(t+1) = \phi_0 + \phi_1 u_k(t) + \phi_2 u_k(t-1)$
2. Select the model with the lowest AIC
3. Generate the prediction  $\hat{u}_k^{\text{pred}}(t+1)$

**Shrinkage estimation** To compute the shrinkage weight  $\lambda$  for combining empirical and predicted estimates:

1. Estimate the variance of the empirical transition probabilities:

$$\widehat{\text{Var}}[\hat{p}_t] \approx \frac{\hat{p}_t(1-\hat{p}_t)}{N_t^+}$$

2. Estimate the MSE of the prediction based on recent performance:

$$\widehat{\text{MSE}}[\hat{p}_t^{\text{pred}}] \approx \frac{1}{W_f} \sum_{i=t-W_f}^{t-1} (\hat{p}_i^{\text{pred}} - \hat{p}_i)^2$$

3. Compute the shrinkage weight:

$$\lambda = \frac{\widehat{\text{Var}}[\hat{p}_t]}{\widehat{\text{Var}}[\hat{p}_t] + \widehat{\text{MSE}}[\hat{p}_t^{\text{pred}}]}$$

4. Combine the estimates:

$$\tilde{p}_t = (1-\lambda)\hat{p}_t + \lambda\hat{p}_t^{\text{pred}}$$

## G.4 Implementation Optimizations

Several optimizations can improve the computational efficiency of SVUCRL:

**Sparse matrix operations** For large state spaces, the transition matrices are often sparse. Using sparse matrix operations can significantly reduce memory usage and computation time. The randomized SVD and incremental RPCA algorithms can be adapted to work with sparse matrices, exploiting the sparsity structure.

**Lazy updates** Since the low-rank model is updated only every  $W$  time steps, many intermediate computations can be deferred. For example, the empirical transition matrices can be updated incrementally, and the full matrix is only formed when needed for the model update.

**Parallel computation** Many parts of the algorithm can be parallelized:

- The randomized SVD algorithm can leverage parallel matrix-matrix multiplications
- The confidence interval constructions for different state-action pairs can be done in parallel
- The forecasting of different factors can be computed independently

**Adaptive rank selection** Instead of using a fixed rank  $\hat{K}$ , we can adaptively determine the rank based on the singular value spectrum:

$$\hat{K}_t = \min \left\{ k : \frac{\sum_{i=1}^k \sigma_i^2}{\sum_{i=1}^{\min(SA, WS)} \sigma_i^2} \geq \gamma \right\}$$

where  $\gamma$  is a threshold (e.g.,  $\gamma = 0.95$ ).

**Efficient EVI implementation** The Extended Value Iteration can be optimized by:

- Caching the optimistic transitions for each state-action pair
- Using priority queue-based updates to focus computation on states with significant value changes
- Warm-starting each EVI run with the value function from the previous episode

## G.5 Parameter Selection Guidelines

The performance of SVUCRL depends on several parameters. We provide guidelines for setting these parameters:

**Structure update window  $W$**  The window size  $W$  controls the frequency of updating the low-rank model. It should be large enough to provide sufficient data for learning the factors, but small enough to track changes in the environment. A reasonable choice is  $W = \Theta(\sqrt{T})$ .

**Variation estimation window  $W_v$**  The window  $W_v$  determines the time scale for estimating local variation. It should be chosen based on the expected rate of change in the environment. For environments with smooth changes, larger values (e.g.,  $W_v = \Theta(\sqrt{T})$ ) are appropriate. For more volatile environments, smaller values (e.g.,  $W_v = \Theta(\log T)$ ) may be better.

**Forecasting window  $W_f$**  The window  $W_f$  sets the horizon for evaluating prediction performance. It should be large enough to provide reliable MSE estimates but small enough to adapt to changing prediction accuracy. A reasonable choice is  $W_f = \Theta(W_v)$ .

**Power iterations  $q$**  The number of power iterations in the randomized SVD affects the accuracy of the low-rank approximation. For most applications,  $q = 1$  or  $q = 2$  provides a good balance between accuracy and computation. For matrices with slowly decaying singular values, larger values may be necessary.

**Oversampling  $s$**  The oversampling parameter in the randomized SVD should be set to  $s \geq 3$ . Larger values improve accuracy at the cost of computation. A typical choice is  $s = 5$  or  $s = 10$ .

**Confidence parameter  $\delta$**  The confidence parameter  $\delta$  controls the failure probability of the confidence intervals. It should be set to a small value, typically  $\delta = 0.1/T$  or  $\delta = 0.01/T$ .

**Target rank  $\hat{K}$**  If not using adaptive rank selection, a conservative choice is  $\hat{K} = \min\{10, \sqrt{SA}\}$ . This captures most of the structure while keeping the computation manageable.

These guidelines provide a starting point for parameter selection, but the optimal values may depend on the specific characteristics of the environment. In practice, a parameter sweep or online adaptation may be necessary to achieve the best performance.

## H Limitations

Despite its theoretical appeal, **SVUCRL** has several important limitations that warrant future investigation:

1. **Low-rank assumption.** Our regret guarantees hinge on Assumption 1, i.e. that *most* non-stationarity lies in a rank- $K \ll SA$  subspace. Highly entangled or full-rank drift can break the  $\sqrt{KST}$  term and lead to vacuous bounds.
2. **Sparse-shock model.** The incremental RPCA step presumes that abrupt changes are sparse across state-action pairs. Large-scale shocks (e.g. global re-parameterisations) violate this sparsity and may induce large approximation errors, inflating confidence widths.
3. **Parameter sensitivity.** Windows  $(W, W_v, W_f)$ , oversampling  $s$ , power iterations  $q$  and the shrinkage threshold all require tuning. Poorly chosen values can negate the theoretical gains and incur additional regret; an adaptive, provably robust selection rule is still missing.
4. **Computational overhead.** Although §8 exploits randomized SVD and streaming updates, the per-update cost is  $\mathcal{O}(TSA(SK + S) \log T)$ —substantial for very large  $S$  or dense transition tensors. Scaling to high-dimensional continuous spaces will need function approximation or sketching techniques beyond the present scope.

These caveats highlight directions for extending **SVUCRL** towards more realistic and large-scale reinforcement-learning settings.
